# Supplementary material for: New chemotherapy regimens and biomarkers for Chagas disease: the rationale and design of the TESEO study, an open-label, randomised, prospective, phase-2 clinical trial in the Plurinational State of Bolivia
Source: HighWire-hosted journal article supplement (doi:10.1136/bmjopen-2021-052897), 2021-12-01
Supplement: bmjopen-2021-052897supp001_data_supplement.pdf [file bmjopen-2021-052897supp001_data_supplement.pdf]

**Appendix table 1** Blood and urine sampling in the TESEO clinical trial.

| Procedure/Assay                                                    | Maximum volume (mL) collected per procedure | Number of collections | Days and months of collection *                                                                                                               | Total volume (mL) per procedure in the entire study |
|--------------------------------------------------------------------|---------------------------------------------|-----------------------|-----------------------------------------------------------------------------------------------------------------------------------------------|-----------------------------------------------------|
| <b>Blood/Serum</b>                                                 |                                             |                       |                                                                                                                                               |                                                     |
| Biomarkers (BMKs) (serum)                                          | 5.0                                         | 11-12                 | Days 0-1, 14-17, 29-32, 59-62, and 89-92 (ata); months 4, 6, 12, 18, 24, 30, and 36 (ata)                                                     | 50-55                                               |
| Serum bank (serum)                                                 | 2.0                                         | 10-11                 | Days 0-1, 14-17, 29-32, 59-62, and 89-92 (ata); months 4, 6, 12, 18, 24, 30, and 36 (ata)                                                     | 20-22                                               |
| Biochemical tests (serum)                                          | 0.7                                         | 11-14                 | Days -28, 14-17, 29-32, 43-46, 59-62, 74-77, and 89-92 (ata); months 4, 6, 12, 18, 24, 30, and 36 (ata)                                       | 7.7-9.8                                             |
| Hematological tests (blood)                                        | 0.1                                         | 11-14                 | Days -28, 14-17, 29-32, 43-46, 59-62, 74-77, and 89-92 (ata); months 4, 6, 12, 18, 24, 30, and 36 (ata)                                       | 1.1-1.4                                             |
| Chagas disease conventional serology (CDCS) (serum)                | 1.0                                         | 9                     | Days -28, 29-32, 59-62, and 89-92 (ata); months 4, 6, 12, 18, 24, 30, and 36 (ata)                                                            | 8.1                                                 |
| qPCR (blood)                                                       | 15.0                                        | 10-11                 | Days -28 and 14-17 (ata), 29-32 (only EOT-30 arms), 59-62 (ata), and 89-92 (only EOT-90 arms); months 4, 6, 12, 18, 24, 30, and 36 (ata)      | 150-165                                             |
| popPK (blood)                                                      | 1.2                                         | 14-18                 | Days 0-1, 8-11, 14-17, 29-32, 43-46, and 59-62 (ata), 74-77 (only EOT-90 arms), and 89-92 (only EOT-90 arms)                                  | 14-18                                               |
| Filter-paper (blood)                                               | 0.25<br>(five blood circles of 50 µL each)  | 12-15                 | Days 0-1, 8-11, 14-17, 29-32, and 43-46 (ata), 59-62 (only EOT-60), 74-77, and 89-92 (only EOT-90); months 4, 6, 12, 18, 24, 30, and 36 (ata) | 3-3.5                                               |
| Pregnancy tests (serum) (excess from sample for biochemical tests) | 0.3                                         | 3-5                   | Days -28, 0-1, and 29-32 (ata), 59-62 (only EOT-60 and EOT-90 arms), and 89-92 (only EOT-90 arms)                                             | 0.9-1.5                                             |
| <b>TOTAL</b>                                                       | <b>25.0</b>                                 | <b>—</b>              | <b>—</b>                                                                                                                                      | <b>327-255</b>                                      |
| <b>Urine</b>                                                       |                                             |                       |                                                                                                                                               |                                                     |
| Future analysis of BMKs                                            | 10                                          | 10-11                 | Days 0, 14-17, 29-32, 59-62, and 89-92 (ata); months 4, 6, 12, 18, 24, 30, and 36 (ata)                                                       | 100-110                                             |
| <b>TOTAL</b>                                                       | <b>10</b>                                   | <b>—</b>              | <b>—</b>                                                                                                                                      | <b>100-110</b>                                      |

\* ata, all treatment arms
